# Supplementary material
Source: PubMed Central journal article supplement (PMC5253341)
Supplement: NIHMS792431-supplement-Supplemental_Tables.pdf [file NIHMS792431-supplement-Supplemental_Tables.pdf]

**Supplemental Table 1.** Comparison of demographic characteristics between individuals who answered all PrEP questions (N=548) and those who answered all demographic questions but were not included in analytic sample (N=1,226)

|                                                           | <b>In PrEP Sample</b> | <b>Not In PrEP Sample</b> |
|-----------------------------------------------------------|-----------------------|---------------------------|
| Age, years (median, IQR)                                  | 22 (20 to 25)         | 22 (20 to 25)             |
| Current Province                                          |                       |                           |
| Ho Chi Minh City                                          | 371 (67.7%)           | 744 (63.1%)               |
| Hanoi                                                     | 47 (8.6%)             | 148 (12.1%)               |
| Other                                                     | 130 (23.7%)           | 304 (24.8%)               |
| University or above versus less than university education | 428 (78.1%)           | 876 (71.5%)               |
| Sexual identity                                           |                       |                           |
| Gay/homosexual                                            | 456 (83.2%)           | 956 (78.0%)               |
| Bisexual                                                  | 69 (12.6%)            | 216 (17.6%)               |
| Heterosexual                                              | 4 (0.7%)              | 10 (0.8%)                 |
| Unsure/questioning                                        | 35 (6.4%)             | 82 (6.7%)                 |
| Sexually active, past 12 months                           | 424 (77.4%)           | 836 (68.2%)               |

**Supplemental Table 2.** Multivariable models using a missing indicator for missing sexual behavior and psychosocial data

|                                                           | <b>Heard of PrEP</b>       | <b>Preference for Rectal Microbicide</b> | <b>Preference for Injectable PrEP</b> | <b>Preference for Oral PrEP</b> |
|-----------------------------------------------------------|----------------------------|------------------------------------------|---------------------------------------|---------------------------------|
|                                                           | aOR (95% CI)               | aOR (95% CI)                             | aOR (95% CI)                          | aOR (95% CI)                    |
| Age                                                       | 1.05 (1.00 to 1.10)        | <b>0.95 (0.91 to 0.99)</b>               | <b>1.08 (1.02 to 1.14)</b>            | 1.00 (0.94 to 1.06)             |
| Current Province                                          |                            |                                          |                                       |                                 |
| Ho Chi Minh City                                          | 1.00                       | 1.00                                     | 1.00                                  | 1.00                            |
| Hanoi                                                     | 0.45 (0.20 to 1.05)        | 0.82 (0.42 to 1.61)                      | 1.84 (0.84 to 4.00)                   | 0.72 (0.30 to 1.73)             |
| Other                                                     | 0.62 (0.37 to 1.04)        | 1.24 (0.79 to 1.98)                      | 1.00 (0.55 to 1.79)                   | 0.69 (0.38 to 1.26)             |
| University or above versus less than university education | 1.24 (0.72 to 2.16)        | 1.13 (0.69 to 1.83)                      | 0.85 (0.46 to 1.55)                   | 1.01 (0.55 to 1.84)             |
| Sexual identity                                           |                            |                                          |                                       |                                 |
| Gay/homosexual                                            | 0.67 (0.18 to 2.57)        | 1.54 (0.44 to 5.39)                      | 1.18 (0.37 to 3.78)                   | 0.49 (0.12 to 2.07)             |
| Bisexual                                                  | 0.74 (0.19 to 2.89)        | 1.36 (0.39 to 4.73)                      | 1.13 (0.35 to 3.72)                   | 0.66 (0.16 to 2.78)             |
| Heterosexual                                              | NA                         | NA                                       | 5.17 (0.58 to 46.2)                   | 3.81 (0.35 to 41.4)             |
| Unsure/questioning                                        | 1.00 (0.27 to 3.68)        | 1.78 (0.50 to 6.31)                      | 1.40 (0.44 to 4.51)                   | 0.27 (0.05 to 1.28)             |
| Sexually active, past 12 months                           | 0.87 (0.46 to 1.62)        | 0.80 (0.45 to 1.42)                      | 0.95 (0.48 to 1.87)                   | 1.59 (0.73 to 3.46)             |
| Used any health service, past 12 months                   | 1.05 (0.66 to 1.67)        | 1.46 (0.96 to 2.22)                      | 0.70 (0.41 to 1.18)                   | 0.80 (0.47 to 1.34)             |
| STI tested in the past 12 months                          | 1.38 (0.75 to 2.53)        | 0.69 (0.38 to 1.27)                      | 0.91 (0.41 to 1.99)                   | 1.81 (0.87 to 3.74)             |
| HIV tested in the past 12 months                          | <b>1.86 (1.15 to 3.02)</b> | 1.29 (0.81 to 2.04)                      | 1.20 (0.67 to 2.14)                   | 0.55 (0.31 to 1.00)             |
| HIV knowledge score                                       | <b>1.35 (1.09 to 1.67)</b> | 1.05 (0.87 to 1.27)                      | 1.05 (0.82 to 1.33)                   | 0.88 (0.70 to 1.12)             |
| Condomless receptive anal intercourse                     | <b>2.35 (1.32 to 4.17)</b> | 1.11 (0.65 to 1.88)                      | 0.88 (0.44 to 1.76)                   | 0.93 (0.50 to 1.75)             |
| Missing                                                   | 2.18 (0.87 to 5.48)        | 2.18 (0.89 to 5.33)                      | 1.05 (0.35 to 3.18)                   | 0.31 (0.11 to 0.90)             |
| Condomless insertive anal intercourse                     | 0.58 (0.33 to 1.04)        | <b>2.15 (1.24 to 3.74)</b>               | 0.77 (0.38 to 1.56)                   | <b>0.40 (0.20 to 0.79)</b>      |
| Missing                                                   | 1.47 (0.50 to 4.28)        | 0.39 (0.14 to 1.10)                      | 3.07 (0.72 to 13.2)                   | 1.64 (0.50 to 5.38)             |
| Number of partners, last 3 months                         |                            |                                          |                                       |                                 |
| 0                                                         | 1.00                       | 1.00                                     | 1.00                                  | 1.00                            |
| 1                                                         | 0.66 (0.30 to 1.45)        | 0.91 (0.44 to 1.87)                      | 0.75 (0.31 to 1.85)                   | 1.47 (0.57 to 3.75)             |
| 2+                                                        | 0.61 (0.26 to 1.41)        | 0.52 (0.24 to 1.13)                      | 1.17 (0.46 to 2.99)                   | 2.33 (0.88 to 6.21)             |
| Missing                                                   | 0.30 (0.10 to 0.90)        | 0.94 (0.36 to 2.47)                      | 0.37 (0.09 to 1.49)                   | 2.28 (0.71 to 7.35)             |
| Depression                                                | 0.79 (0.50 to 1.26)        | 0.70 (0.45 to 1.06)                      | <b>2.15 (1.24 to 3.71)</b>            | 0.82 (0.48 to 1.42)             |
| Missing                                                   | 0.62 (0.32 to 1.20)        | 0.88 (0.49 to 1.60)                      | 1.19 (0.54 to 2.59)                   | 1.04 (0.51 to 2.12)             |
| Alcohol dependency                                        | 0.86 (0.53 to 1.40)        | 1.23 (0.79 to 1.93)                      | 0.90 (0.51 to 1.58)                   | 0.85 (0.49 to 1.47)             |
| Missing                                                   | 1.39 (0.70 to 2.76)        | 0.93 (0.49 to 1.78)                      | 1.41 (0.64 to 3.09)                   | 0.78 (0.35 to 1.75)             |
| Maximum willing to pay for PrEP                           | NA                         | <b>0.80 (0.70 to 0.90)</b>               | <b>1.16 (1.00 to 1.35)</b>            | <b>1.20 (1.03 to 1.39)</b>      |

**Supplementary Table 3.** Multivariable models excluding variables with missing data

|                                                           | <b>Heard of PrEP</b>       | <b>Preference for Rectal Microbicide</b> | <b>Preference for Injectable PrEP</b> | <b>Preference for Oral PrEP</b> |
|-----------------------------------------------------------|----------------------------|------------------------------------------|---------------------------------------|---------------------------------|
|                                                           | aOR (95% CI)               | aOR (95% CI)                             | aOR (95% CI)                          | aOR (95% CI)                    |
| Age                                                       | 1.03 (0.99 to 1.08)        | <b>0.95 (0.91 to 0.99)</b>               | <b>1.07 (1.02 to 1.12)</b>            | 1.00 (0.95 to 1.06)             |
| Current Province                                          |                            |                                          |                                       |                                 |
| Ho Chi Minh City                                          | 1.00                       | 1.00                                     | 1.00                                  | 1.00                            |
| Hanoi                                                     | 0.45 (0.20 to 1.01)        | 0.90 (0.47 to 1.73)                      | 1.63 (0.76 to 3.46)                   | 0.69 (0.29 to 1.65)             |
| Other                                                     | 0.64 (0.39 to 1.05)        | 1.29 (0.82 to 2.03)                      | 0.93 (0.53 to 1.66)                   | 0.71 (0.39 to 1.27)             |
| University or above versus less than university education | 1.21 (0.71 to 2.05)        | 1.13 (0.71 to 1.80)                      | 0.82 (0.45 to 1.47)                   | 1.05 (0.58 to 1.88)             |
| Sexual identity                                           |                            |                                          |                                       |                                 |
| Gay/homosexual                                            | 0.60 (0.16 to 2.22)        | 1.72 (0.50 to 5.92)                      | 1.10 (0.37 to 3.3)                    | 0.58 (0.14 to 2.45)             |
| Bisexual                                                  | 0.58 (0.15 to 2.19)        | 1.68 (0.49 to 5.80)                      | 6.51 (0.81 to 52.0)                   | 0.68 (0.16 to 2.92)             |
| Heterosexual                                              | NA                         | NA                                       | 0.98 (0.32 to 3.02)                   | 3.71 (0.31 to 44.0)             |
| Unsure/questioning                                        | 0.94 (0.26 to 3.40)        | 1.93 (0.55 to 6.80)                      | 1.50 (0.49 to 4.54)                   | 0.28 (0.06 to 1.40)             |
| Sexually active, past 12 months                           | 0.73 (0.43 to 1.21)        | 0.85 (0.53 to 1.37)                      | 0.71 (0.40 to 1.26)                   | 1.89 (1.00 to 3.56)             |
| Used any health service, past 12 months                   | 1.08 (0.69 to 1.69)        | 1.39 (0.93 to 2.08)                      | 0.74 (0.45 to 1.22)                   | 0.81 (0.49 to 1.34)             |
| STI tested in the past 12 months                          | 1.49 (0.83 to 2.66)        | 0.70 (0.39 to 1.25)                      | 0.94 (0.44 to 1.98)                   | 1.80 (0.90 to 3.60)             |
| HIV tested in the past 12 months                          | <b>1.60 (1.00 to 2.54)</b> | 1.33 (0.85 to 2.08)                      | 1.17 (0.67 to 2.04)                   | 0.57 (0.32 to 1.00)             |
| HIV knowledge score                                       | <b>1.31 (1.07 to 1.62)</b> | 1.04 (0.87 to 1.26)                      | 1.03 (0.81 to 1.30)                   | 0.92 (0.73 to 1.15)             |
| Maximum willing to pay for PrEP                           | NA                         | <b>0.82 (0.72 to 0.93)</b>               | <b>1.17 (1.01 to 1.35)</b>            | 1.15 (0.99 to 1.33)             |

**Supplementary Table 4.** Complete case multivariable models (N=289)

|                                                           | <b>Heard of PrEP</b>       | <b>Preference for Rectal Microbicide</b> | <b>Preference for Injectable PrEP</b> | <b>Preference for Oral PrEP</b> |
|-----------------------------------------------------------|----------------------------|------------------------------------------|---------------------------------------|---------------------------------|
|                                                           | aOR (95% CI)               | aOR (95% CI)                             | aOR (95% CI)                          | aOR (95% CI)                    |
| Age                                                       | 1.05 (0.98 to 1.12)        | 0.95 (0.89 to 1.00)                      | <b>1.08 (1.01 to 1.16)</b>            | 1.01 (0.93 to 1.08)             |
| Current Province                                          |                            |                                          |                                       |                                 |
| Ho Chi Minh City                                          | 1.00                       | 1.00                                     | 1.00                                  | 1.00                            |
| Hanoi                                                     | 0.34 (0.12 to 1.00)        | 0.46 (0.19 to 1.12)                      | 2.28 (0.80 to 6.48)                   | 1.36 (0.49 to 3.80)             |
| Other                                                     | 0.48 (0.22 to 1.02)        | 1.28 (0.67 to 2.44)                      | 0.90 (0.39 to 2.10)                   | 0.70 (0.46 to 2.81)             |
| University or above versus less than university education | 1.44 (0.63 to 3.29)        | 1.62 (0.81 to 3.26)                      | 0.43 (0.18 to 1.00)                   | 1.13 (0.46 to 2.81)             |
| Sexual identity                                           |                            |                                          |                                       |                                 |
| Gay/homosexual                                            | NA                         | NA                                       | NA                                    | NA                              |
| Bisexual                                                  |                            |                                          |                                       |                                 |
| Heterosexual                                              |                            |                                          |                                       |                                 |
| Unsure/questioning                                        |                            |                                          |                                       |                                 |
| Sexually active, past 12 months                           | 0.50 (0.22 to 1.15)        | 0.64 (0.31 to 1.34)                      | 1.25 (0.49 to 3.19)                   | 1.58 (0.63 to 3.95)             |
| Used any health service, past 12 months                   | 1.62 (0.80 to 3.28)        | 1.27 (0.69 to 2.33)                      | 0.84 (0.38 to 1.84)                   | 0.83 (0.39 to 1.75)             |
| STI tested in the past 12 months                          | 1.41 (0.64 to 3.12)        | 0.99 (0.40 to 1.91)                      | 0.66 (0.23 to 1.86)                   | 1.63 (0.66 to 4.02)             |
| HIV tested in the past 12 months                          | 1.80 (0.92 to 3.51)        | 0.92 (0.49 to 1.71)                      | 1.41 (0.63 to 3.12)                   | 0.83 (0.38 to 1.80)             |
| HIV knowledge score                                       | <b>1.37 (1.00 to 1.87)</b> | 1.07 (0.81 to 1.42)                      | 0.95 (0.66 to 1.38)                   | 0.95 (0.67 to 1.33)             |
| Condomless receptive anal intercourse                     | 1.75 (0.87 to 3.49)        | 1.34 (0.71 to 2.53)                      | 0.78 (0.35 to 1.75)                   | 0.80 (0.37 to 1.74)             |
| Condomless insertive anal intercourse                     | 0.71 (0.35 to 1.44)        | 1.76 (0.91 to 3.39)                      | 0.94 (0.40 to 2.20)                   | 0.48 (0.21 to 1.10)             |
| Number of partners, last 3 months                         | 0.99 (0.92 to 1.08)        | 0.95 (0.88 to 1.03)                      | 0.99 (0.89 to 1.11)                   | 1.07 (0.99 to 1.16)             |
| Depression                                                | 0.76 (0.42 to 1.38)        | 0.61 (0.36 to 1.05)                      | <b>2.84 (1.42 to 5.69)</b>            | 0.77 (0.40 to 1.51)             |
| Alcohol dependency                                        | 0.63 (0.32 to 1.22)        | 1.35 (0.74 to 2.47)                      | 1.04 (0.49 to 2.20)                   | 0.61 (0.28 to 1.33)             |
| Maximum willing to pay for PrEP                           | NA                         | 0.93 (0.78 to 1.09)                      | 1.10 (0.90 to 1.35)                   | 1.01 (0.82 to 1.25)             |
